1 **Addition of insoluble fiber to isolation media allows for increased metabolite diversity of**  
2 **lab-cultivable microbes derived from zebrafish gut samples**

3

4 **Short title:** Fiber increases metabolite diversity of microbes derived from zebrafish guts

5

6 **Authors**

7 Alanna R. Condren<sup>1</sup>, Maria S Costa<sup>1,2</sup>, Natalia Rivera Sanchez<sup>1</sup>, Sindhu Konkapaka<sup>1</sup>, Kristin L  
8 Gallik<sup>3</sup>, Ankur Saxena<sup>3</sup>, Brian T Murphy<sup>1</sup>, Laura M Sanchez<sup>1\*</sup>

9

10 **Affiliations**

- 11 1. Department of Pharmaceutical Sciences, University of Illinois at Chicago, 833 S Wood  
12 St Chicago, IL 60612
- 13 2. Faculty of Pharmaceutical Sciences, University of Iceland, Hagi, Hofsvallagata 53, IS-  
14 107 Reykjavik, Iceland
- 15 3. Department of Biological Sciences, University of Illinois at Chicago, 900 S Ashland Ave,  
16 Chicago IL 60607

17

18 **Correspondence**

19 \*E-mail: [sanchelm@uic.edu](mailto:sanchelm@uic.edu); Phone: 312-996-0842

20 **Addition of insoluble fiber to isolation media allows for increased metabolite diversity of**  
21 **lab-cultivable microbes derived from zebrafish gut samples**

22

23 **Abstract:**

24 There is a gap in measured microbial diversity when comparing genomic sequencing  
25 techniques versus cultivation from environmental samples in a laboratory setting. Standardized  
26 methods in artificial environments may not recapitulate the environmental conditions that native  
27 microbes require for optimal growth. For example, the intestinal tract houses microbes at  
28 various pH values as well as minimal oxygen and light environments. These microbes are also  
29 exposed to an atypical source of carbon: dietary fiber compacted in fecal matter. To investigate  
30 how the addition of insoluble fiber to isolation media could affect the cultivation of microbes from  
31 zebrafish intestines, an isolate library was built and analyzed using the bioinformatics pipeline  
32 IDBac. The addition of fiber led to an increase in bacterial growth and encouraged the growth of  
33 species from several phyla. Furthermore, fiber addition altered the metabolism of the cultivated  
34 gut-derived microbes and induced the production of unique metabolites that were not produced  
35 when microbes were otherwise grown on standard isolation media. Addition of this inexpensive  
36 carbon source to media supported the cultivation of a diverse community whose specialized  
37 metabolite production may more closely replicate their metabolite production *in vivo*.

38

39 **Keywords:** gut microbes, *in vitro* cultivation, insoluble fiber, natural products, zebrafish,  
40 metabolomics

41

42 **Introduction:**

43 Over the past 40 years, scientists searched for alternative strategies to increase the  
44 diversity of microbes isolated from environmental samples in a laboratory setting. Dubbed in  
45 1932 as “the great plate count anomaly”, Razumov *et al.* noted that there was a large  
46 discrepancy between the viable plate count of aquatic bacteria on petri dishes compared to  
47 direct microscopic counts from the same environmental habitat.<sup>1</sup> As more researchers reiterated  
48 the lack of a diverse community *in vitro*, confirming the phenomenon, a need for modifications in  
49 the cultivation process were imperative to improve isolation.

50 There are numerous variables that can be altered such as pH, salinity, temperature,  
51 oxygen levels, incubation time, and carbon and nitrogen substrates to create an *in vitro*  
52 environment that better represents the *in vivo* environment.<sup>2</sup> Microbes have evolved to live in  
53 niche environments and their survival is dependent on the available simple or complex carbon  
54 and nitrogen substrates. Therefore, if a laboratory medium is lacking the main organic  
55 substrates that a microbe has evolved to use, this may help contribute to the plate count  
56 anomaly as the microbe may fail to grow *in vitro*. One of the earliest examples in altering the  
57 carbon substrate in a medium is the addition of the water-insoluble fraction of Alfalfa hay to petri  
58 dishes. This addition lead to an increase in colony counts of the microbes that colonize the  
59 rumen of cattle.<sup>3</sup> Others contain substrates such as glass or cotton-fibers as an alternative for  
60 agar to evade fluctuating seaweed prices.<sup>4,5</sup> Altering carbon sources gained further attention in  
61 the mid-2000’s with reports that modifying the organic carbon substrate in media recipes altered  
62 microbe growth and sporulation of environmental isolates.<sup>6,7</sup> This catalyzed a variety of studies  
63 that altered media to increase bacterial production of pharmaceutically relevant molecular  
64 classes, escalate potential biodiesel sources, as well as encourage growth of specific bacterial  
65 species from animal microbiomes.<sup>8-10</sup> This research solidified the foundation for what is now  
66 common practice to utilize several media when attempting to cultivate microbes from  
67 environmental samples (Figure S1). Recent studies have revealed that utilizing different organic

68 carbon substrates can alter bacterial metabolism, leading to the discovery of novel compounds  
69 and potential biofilm inhibitors.<sup>11,12</sup>

70 Taking these developments into consideration, we were interested in cultivating the  
71 zebrafish gut microbiome to build a library of bacteria for testing in high-throughput antimicrobial  
72 and biofilm assays.<sup>13,14</sup> When considering the native environment of vertebrate intestines, the  
73 main components of the system include the dietary nutrients entering the system for digestion  
74 and the indigestible nutrients that represent the fecal matter. Therefore, for microbes living in  
75 the intestinal tract, dietary fiber may serve as a large resource of nutrients and carbon. To  
76 optimize bacterial cultivation and isolation from zebrafish intestines, we utilized four types of  
77 media varying in nutrient density. Interestingly, the addition of organic insoluble fiber to the least  
78 nutrient medium led to an increase in the number of colonies observed on isolation plates as  
79 well as an increase in the diversity of colony morphologies.

80 Though the zebrafish gut microbiome varies slightly throughout development, once  
81 adulthood is reached, the gut microbiome is heavily conserved and strongly colonized by  $\gamma$ -  
82 Proteobacteria, Firmicutes, and Fusobacteria.<sup>15,16</sup> Using the high-throughput bioinformatics  
83 pipeline IDBac,<sup>17</sup> we isolated and analyzed 118 individual colonies from the zebrafish gut  
84 microbiome. IDBac analysis showed that our cultivation technique generated a taxonomically  
85 diverse library, reflecting that of previous metagenomic studies of the zebrafish gut microbiome,  
86 *vide supra*. Confirmation of a subset of the isolates with 16S rRNA gene sequencing showed  
87 that out of the 118 bacterial colonies isolated, our library represents bacterial isolates from three  
88 phyla. In this study we show that addition of insoluble fiber to low nutrient agar can increase the  
89 number of microbes isolated from vertebrate intestines. This simple, affordable addition also  
90 alters the specialized metabolite production of bacterial isolates allowing the bacteria to produce  
91 different metabolites that may be more similar to those produced *in vivo* in an *in vitro*  
92 environment.<sup>18</sup>

93

94 **Results**

95 **Addition of insoluble fiber to low nutrient agar plates increases bacterial growth.** To

96 cultivate gut-derived microbes from zebrafish intestines, four types of agar media were used to  
97 target both fast and slow growing bacteria. Plates varied in nutrient density with high vitamin  
98 freshwater (HVF), NTF, SNF + fiber, and simple nutrient freshwater (SNF) decreasing in nutrient  
99 density respectively (**Figure 1**).<sup>7,19</sup> Over 100 individual colonies were isolated over three months  
100 of growth to construct a zebrafish gut microbiome library. Addition of fiber to the least nutrient  
101 medium (SNF) led to a 1.7-fold increase in bacterial colony growth, surpassing the highest  
102 nutrient medium (HVF). Dissection of two healthy zebrafish intestines and two plating  
103 techniques in triplicate led to the isolation of 23, 38, 36, and 21 individual colonies from the  
104 HVF, NTF, SNF + fiber, and SNF plates, respectively.

105 **IDBac analysis reveals that addition of insoluble fiber supports a diverse cultivation of**

106 **gut microbes from agar plates.** Library isolates were prepared for bioinformatics analysis  
107 using IDBac, a matrix-assisted laser desorption/ionization time-of-flight (MALDI-TOF) mass  
108 spectrometry pipeline that allows for rapid analysis of microbial proteins and specialized  
109 metabolites.<sup>17,20</sup> The standard IDBac workflow uses a 70% aqueous formic acid solution to lyse  
110 cells but we found that this procedure was not efficient at lysing the more mucoid bacterial  
111 colonies isolated.<sup>20</sup> A trifluoroacetic acid (TFA) extraction prior to plating samples for analysis  
112 was the most effective method to consistently collect viable MS fingerprint profiles for IDBac  
113 analysis.<sup>21</sup> Measuring proteins in the 3,000 to 15,000 Da range, IDBac organized the microbial  
114 isolates into a pseudo-phylogeny dendrogram based on MS fingerprint protein similarity.<sup>17</sup>

115 **Figure 2** highlights 82 of the 118 bacterial isolates from our library. 16S rRNA sequencing was  
116 performed on a subset of isolates. In tandem, these analyses confirmed the generated library is  
117 diverse containing a minimum of 15 identified species within three phyla: Actinobacteria,  
118 Proteobacteria, and Firmicutes.

119 **Metabolite association network highlights changes in metabolite production with**

120 **different carbon sources.** The IDBac pipeline also generates metabolite association networks  
121 (MANs) for rapid visualization of metabolite production and allows for a simple comparison  
122 between bacterial isolates grown in different conditions.<sup>20</sup> **Figure 3A** shows a dendrogram  
123 highlighting 16 isolates that were grown on ISP2 agar, commonly used for lab cultivation, or  
124 SNF + fiber agar plates.<sup>22</sup> In a MAN, nodes correspond to ions detected in a sample and the  
125 relationships between production across strains or conditions are visualized as arrows  
126 connecting nodes. The MANs of two isolates (**Figure 3B**; N2015 and S2008) imply that both  
127 have unique specialized metabolite production potential and when grown on agar supplemented  
128 with fiber, there is an increase in the unique specialized metabolites detected. The MAN for  
129 isolate SF2016 (**Figure 3C**), which was cultivated from a SNF + Fiber plate, is a robust producer  
130 of specialized metabolites. Interestingly, when comparing the two conditions, there is a larger  
131 number of nodes detected when grown without fiber.

132 **Growth of gut microbes with insoluble fiber significantly increases the number of unique**  
133 **metabolites produced.** High resolution liquid chromatography mass spectrometry (HR-LC-MS)  
134 of bacterial extracts from library isolates, SF2016, N2105, and S2008, were analyzed using  
135 XCMS, a metabolomic platform for statistical analyses of HR-LC-MS data. Through pairwise  
136 comparisons, XCMS can determine features (ion and retention time pair) that are up regulated  
137 in one extract versus another and visualize these differences via a cloud plot. As seen in **Figure**  
138 **4A & B**, a cloud plot compares the total ion chromatograms (TIC) of two samples (i.e SF2016  
139 grown on fiber agar vs. fiber agar control). Upregulated features are denoted by a circle and the  
140 darker the color of the circle, the more significant the signal. The cloud plot in **Figure 4A**  
141 highlights 49 features that are significantly upregulated by SF2016 when grown on fiber agar  
142 versus the 15 features observed when grown on non-fiber medium ( $p < 0.001$ ; **Figure 4B**).  
143 Similar cloud plots with the isolates N2015 and S2008 exhibit the increased trend with more  
144 features when the isolates were grown on fiber agar ( $p < 0.001$ ; **Figures S2 & S3**). Using XCMS  
145 meta-analysis, the number of significant features produced by the three isolates were organized

146 into a Venn diagram to visualize the number of features unique to a specific isolate or shared  
147 between two or more (**Figure 4C & D**). When comparing the number of features produced by  
148 SF2016, N2015, and S2008 on fiber agar versus ISP2, the isolates had a 3.2, 3.3, and 1.5 fold  
149 change in features from growth with insoluble fiber.

#### 150 **Discussion:**

151 Microbial libraries for high-throughput drug discovery screening are typically generated  
152 using two to six isolation media, varying in nutrient density, which select for fast or slow growing  
153 bacteria from an environmental sample.<sup>23–26</sup> To generate a diverse library of gut-derived  
154 cultivable microbes from the zebrafish intestine as well as capture the unique metabolite  
155 production of this community, it is important to consider the carbon source(s) in the media. With  
156 dietary fiber being a highly abundant substrate for microbes colonizing the intestines, a fourth  
157 type of medium was utilized that incorporated the addition of insoluble fiber into SNF (the least  
158 nutrient medium). Using four types of media varying from high nutrient density to low, HVF,  
159 NTF, SNF + Fiber, and SNF respectively, 118 bacterial colonies were isolated to constitute a  
160 zebrafish gut microbiome library (**Figure 1**). The addition of wet-autoclaved insoluble fiber (20  
161 g/L) lead to an increase in the growth of individual bacterial colonies (**Table S1**). The highest  
162 yield of bacterial isolates were collected from the average nutrient medium (NTF) however, the  
163 addition of fiber to the SNF lead to nearly an identical isolate yield (**Table S1**). Of note, the  
164 addition of fiber is a minimal and inexpensive addition compared to media typically used in  
165 environmental isolations (**Table S2**).

166 The potential taxonomic and specialized metabolite diversity of the cultivated isolates  
167 were assessed to confirm whether the isolates matched previous metagenomic sampling  
168 studies.<sup>15,16</sup> To investigate the newly generated library, a bioinformatics platform known as  
169 IDBac was used to characterize the isolates. The IDBac workflow and software were designed  
170 to rapidly collect protein and specialized metabolite profiles of microbial libraries produced from  
171 environmental samples utilizing a MALDI-TOF mass spectrometer.<sup>17,20</sup> Of the 118 isolates, 82

172 were examined using the IDBac workflow to organize the microbial library (**Figure 2**).The  
173 remaining 36 isolates were not analyzed due to either poor data quality collection during MALDI-  
174 TOF MS analysis or failure to recultivate from the initial glycerol stock (**Table S1**). Based on the  
175 MS protein fingerprints of the isolates, the newly constructed library represents three phyla.  
176 However, a number of isolates did not group into distinct branches nor with the IDBac in-house  
177 library that is built primarily from freshwater sponge-isolates,<sup>17</sup> cheese microbes,<sup>27</sup> and wild fish  
178 gut-derived microbes.<sup>24</sup> Therefore, 16S rRNA sequencing on a subset of isolates in this library  
179 was performed to confirm the identity of a subset of the isolates and provide insight towards  
180 whether the cultivation efforts did support the growth of a diverse, gut microbe library (**Table**  
181 **S4**). Addition of taxonomic information gathered from 16S rRNA sequencing analysis to **Figure**  
182 **2** supports the groupings formed from IDBac analysis.

183         Metagenomic studies of zebrafish intestines have shown that adults are colonized by a  
184 multitude of bacteria with  $\gamma$ -Proteobacteria, Firmicutes, and Fusobacteria as the most abundant  
185 members.<sup>15,16</sup> 16S rRNA sequence analysis confirmed our cultivation strategy produced a  
186 library that accurately represents the major components of the zebrafish gut microbiome with  
187 representatives from the Firmicute, Actinobacteria, and Proteobacteria phyla (**Figure 2**).  
188 Bacteria from the three phyla have been linked to the gut and overall organism health.  
189 Firmicutes typically colonize the large intestines, primarily the colon, and are one of the most  
190 prevalent phyla represented in the gut microbiome.<sup>28</sup> They have documented roles in  
191 fermentation of carbohydrates as well as lipid droplet formation for energy storage.<sup>29,30</sup> In our  
192 dendrogram we observe the same trend with a considerable number of our isolates grouped  
193 into the Firmicute phylum (**Figure 2**). Of the Firmicutes isolated, *B. subtilis* was the most  
194 abundant isolate in this phylum. During its lifecycle in the gut, *B. subtilis* is known to form spores  
195 in half the time it takes for a laboratory isolate.<sup>31</sup> Thus, it is possible the increase in isolation of  
196 *B. subtilis* in our library is due to the isolation of the more prolific, endogenous *B. subtilis* isolates  
197 from zebrafish intestines. *B. subtilis* has also been shown to protect fish from the aquatic



198 pathogen *Aeromonas hydrophila*, which causes inflammation and steep mortality rates.<sup>32</sup> With  
199 *A. hydrophila* infections being a persisting problem in zebrafish research facilities, the protective  
200 bioactivity of *B. subtilis* could contribute to the large representation of this species in our  
201 isolation efforts.<sup>33</sup> Microbes responsible for maintaining homeostasis in the gut microbiome  
202 system fall under the Actinobacteria phylum.<sup>34</sup> These maintenance microbes, which also reside  
203 in the colon, make up only a small portion of the gut microbiome community even though they  
204 hold a pivotal role in overall gut flora health.<sup>28,34</sup> Once again, our dendrogram highlights the  
205 successful isolation and profiling of at least three genera of Actinobacteria such as  
206 *Rhodococcus*, *Kocuria*, and *Mycolicibacterium* (**Figure 2**).

207 Lastly, we observe Gram-negative Proteobacteria generally found in the small intestine.  
208 This population is minor with respect to the rest of the gut microbiome because many  
209 Proteobacteria are opportunistic and over colonization of these microbes has been strongly  
210 correlated with several human diseases.<sup>35,36</sup> More specifically, we isolated and profiled  
211 microbes such as *Pseudomonas montelli*, *Aeromonas*, and *Shewanella* that have been  
212 previously isolated from feces and from aquatic environments respectively.<sup>36,37</sup> No  
213 representatives from the Fusobacteria phylum were isolated because the cultivation methods  
214 used did not support the specific conditions needed to grow anaerobic bacteria. However, we  
215 hypothesize that due to the observed increase in cultivation of aerobic bacterial growth in this  
216 study, the same trend would hold if repeated with anaerobic conditions and would support the  
217 growth of Fusobacteria.

218 Following grouping by MS protein fingerprints with IDBac, specialized metabolite  
219 diversity was investigated using a metabolite association network (MAN) that corresponds to the  
220 IDBac generated dendrogram. Using IDBac, a dendrogram was created grouping 16 isolates  
221 grown on ISP2 or SNF + Fiber agar (**Figure 3A**). Selecting isolates N2015 and S2008 on the  
222 dendrogram generated two MANs that correspond to each of the isolates (**Figure 3B**). The  
223 MANs show signals found in both conditions (shared nodes) and unique signals (single nodes)

224 that were detected when an isolate was grown with or without fiber. The MANs highlight that  
225 after removing nodes associated with matrix and the two types of mediums (controls), both  
226 isolates produce more unique specialized metabolites on SNF + Fiber than ISP2 (**Figure 3B**).  
227 Even though neither of these strains were originally isolated from SNF + Fiber plates but rather  
228 NTF and SNF media respectively, the MAN infers that metabolite production is increased by  
229 exposure to insoluble fiber during cultivation. Isolate SF2016 seems to be a prolific producer of  
230 unique chemistry based on the generated MAN (**Figure 3C**). Interestingly, the MAN suggests  
231 that SF2016 produces more unique specialized metabolites when grown on ISP2 medium rather  
232 fiber medium. In the case of SF2016, this is an example of how cultivation through the addition  
233 of insoluble fiber, allowed for the isolation of a prolific metabolite producer from the gut  
234 microbiome.

235 Having used IDBac as a prioritization tool, we aimed to further investigate and quantify  
236 the differences in metabolite production when gut microbes are grown on medium with insoluble  
237 fiber. Bacterial extracts of isolates SF2016, N2015, and S2008 grown on fiber or ISP2 agar,  
238 extracted, and analyzed via HR-LC-MS. The metabolomics platform XCMS was used to analyze  
239 and run statistical analysis on these extracts allowing for the selection of features that are  
240 significant ( $p < 0.001$ ) and abundant (based on fold change in intensities). XCMS can perform a  
241 suite of statistical analyses and output several visual representations of these statistical results  
242 with one example being cloud plots.<sup>38</sup> **Figure 4A** shows a cloud plot comparing two TICs:  
243 SF2016 grown on fiber agar (top) and a fiber agar control (bottom). When grown on fiber agar  
244 SF2016 produces 41 features compared to 15 when SF2016 is grown on ISP2 ( $p < 0.001$ ;  
245 **Figure 4B**). If the significance threshold is relaxed to a  $p < 0.01$ , the number of significant  
246 features between these two conditions are 174 and 49 respectively (**Figure S3**). Regardless of  
247 the threshold set for significance, SF2016 consistently makes 3-fold or more features when  
248 grown on medium supplemented with insoluble fiber than that without. The same trend holds  
249 with isolate N2015 (**Figure S4**) with an increase in unique metabolite production when grown on

250 fiber agar. Interestingly, though S2008 does show unique metabolite production when grown on  
251 fiber agar, the cloud plot does not support that the addition of fiber lead to an increase in the  
252 number of metabolites produced, as observed in previous strains (**Figure S5**).

253         Using XCMS meta analysis, which was designed to prioritize interesting metabolite  
254 features from large metabolomic datasets, significant signals from each of the three isolates  
255 were identified and organized into a Venn diagram.<sup>39</sup> Though SF2016 seems to be the most  
256 prolific of the three isolates when grown with fiber (**Figure 4C**), it is clear that the same trend  
257 holds in N2015 and S2008 with all three isolates showing an increase in metabolite production  
258 when grown on a medium with insoluble fiber compared to ISP2 (**Figure 4C & D**, respectively).  
259 Our HR-LC-MS results support that the addition of insoluble fiber to medium leads to an  
260 increase in specialized metabolite production in a natural product laboratory workflow.

261         It is worth noting that there are differences in the number of observed specialized  
262 metabolites between the IDBac MANs and the XCMS chromatograms. The differences in ions  
263 observed can arise for a variety of reasons. Importantly, these are two different ionization  
264 sources (MALDI vs electrospray ionization - ESI) and the exact mechanism by which ions are  
265 produced is fundamentally different. Various functional groups on the specialized metabolites  
266 themselves may favor one ionization method over the other and neither method is capable of  
267 comprehensively ionizing every metabolite in a given extract. Secondly, the samples subjected  
268 to the analyses are also fundamentally different. MALDI is incredibly fast (milliseconds per  
269 sample) and utilizes a small amount of a microbial colony, this direct detection typically favors  
270 singularly charged ions with little in-source fragmentation. Whereas ESI-LC-MS allows for a  
271 concentration of the colony and surrounding agar, which likely captures a better sampling of  
272 specialized metabolite production. Additionally, LC-MS analyses are time consuming with each  
273 run taking at least 12 mins/colony extraction. This allows for separation of different isomers  
274 which are not possible to distinguish in MALDI-TOF MS. However, ESI is known to give rise to  
275 in-source fragments which may falsely increase the perceived number of specialized

276 metabolites in a given sample. All in all, while the overall numbers of specialized metabolites are  
277 different, the trends hold across these orthogonal methods. So the most prolific producer  
278 observed via the IDBac generated MAN yields the highest number of features in the ESI-LC-MS  
279 analysis.

280 One of the biggest challenges the field of natural products faces is the frequent  
281 rediscovery of known small molecules from environmental samples.<sup>40</sup> Since the discovery of  
282 penicillin over 75 years ago, workflows which include cultivation of select genera mainly based  
283 on morphological features or 16S rRNA followed by bioassay guided fractionation have been  
284 used to continue searching for new drug candidates and/or scaffolds.<sup>41</sup> This workflow has been  
285 historically successful in elucidating novel specialized metabolites produced in high titer by  
286 environmental microbes. However, advances in technologies such as bioinformatics, mass  
287 spectrometry, proteomics, and synthetic biology have improved our ability to identify bioactive  
288 metabolites that are produced in smaller titers. A distinct limitation of these methods however, is  
289 their inability to detect or predict novel metabolites while assessing taxonomic diversity.<sup>41</sup>  
290 Therefore, it is important to consider how changes in cultivation techniques, such as altering  
291 carbon sources, can alter the isolation of specific microbes as well as the abundance and  
292 variety of metabolites produced. As discussed in the introduction, work has already been  
293 completed showing that altering nutrients or growth conditions can lead to increases in  
294 cultivation, altered specialized metabolism, and the discovery of putative drug candidates. Thus,  
295 developing new methods to propagate microbial metabolite production prior to beginning natural  
296 product discovery efforts could be vital to assisting future drug discovery.

297 With the goal of constructing a taxonomically and chemically diverse zebrafish gut  
298 microbe library, insoluble fiber was added to isolation medium as a carbon source. By providing  
299 this solid substrate during *in vitro* growth, we observed an increase in bacterial growth to isolate  
300 microbes from environmental samples. Harnessing the speed, accuracy, and sensitivity of the  
301 IDBac workflow, protein and metabolite profiles of the generated library supported that the

302 increase in cultivation observed from the addition of fiber encouraged growth of the gut  
303 microbial community and suggested that providing insoluble fiber as a carbon source alters  
304 metabolite production of these isolates. Metabolomic statistical analysis of three bacterial  
305 isolates, SF2016, N2015, and S2008, confirmed that regardless of whether an isolate was  
306 originally cultivated from a SNF + Fiber plate, addition of insoluble fiber to growth medium lead  
307 to an increase in metabolite production. Further analysis is required to determine if the increase  
308 in metabolite production observed represents novel metabolites that have not been cultivated *in*  
309 *vitro* or if this cultivation technique allows for metabolite isolation that has traditionally only been  
310 observed *in vivo*. Work is ongoing to perform biological assays and identify constituents from  
311 the cultivable zebrafish gut microbes with antimicrobial and biofilm inhibition activity.

#### 312 **Materials and Methods:**

313 *Agar plate preparation.* Agar plates were prepared by following the medium recipes detailed in  
314 **Table S4**. Mediums were autoclaved for 45 minutes and cooled to 55°C prior to the addition of  
315 25 mg/L of 0.22 micron sterile filtered nalidixic acid and cycloheximide (Sigma).

316 *Dissection of Zebrafish Intestines.* Animals were treated and cared for in accordance with the  
317 National Institutes of Health Guide for the Care and Use of Laboratory animals. All experiments  
318 were approved by the University of Illinois at Chicago Institutional Animal Care and Use  
319 Committee (IACUC). Two adult *casper* zebrafish (lacking pigmentation),<sup>42</sup> were sacrificed at >90  
320 days post fertilization with 0.1% tricaine solution for 10 minutes and bathed in 70% EtOH prior to  
321 dissection. To dissect out intestines, a ventral incision was made from the front fin to the back  
322 fin. If the fish was female, eggs were separated and removed to expose the intestines. Both  
323 ends of the intestinal tract were cut and the tract was removed.

324 *Intestinal sample plating.* The intestines were transferred to a 1x PBS solution with three  
325 sterilized glass beads. This solution was vortexed for several minutes to break up the intestinal  
326 tissues. A 10-fold dilution of the intestinal solution was made before proceeding. Intestinal  
327 solution was plated in triplicate using two plating techniques (1) spreading or (2) serial spotting.

328 For (1) spreading, 100  $\mu$ L of the intestinal sample was pipetted to the agar and spread for even  
329 distribution of the sample. For serial spotting (2), a sterilized cotton swab was dipped into the  
330 intestinal solution and spotted throughout the plate. The entire plating procedure was then  
331 repeated with the 10-fold dilution. Plates were left to grow for up to three months at room  
332 temperature ( $\sim 25^{\circ}\text{C}$ ).

333 *Gut microbe isolation.* Diversity plates were frequently monitored for new growth. New colonies  
334 were transferred to ISP2 to purify to single colonies. Once the purity of the culture was  
335 confirmed, a single colony was transferred to a liquid culture of ISP2 media. This liquid culture  
336 was left to shake at 225 RPM at  $25^{\circ}\text{C}$  until the liquid culture was turbid. Once turbid, the liquid  
337 culture was used to plate the isolate on ISP2 agar and frozen stocked.

338 *IDBac sample preparation.* From the pure isolates grown on ISP2 or SNF + fiber media, a  
339 sterilized toothpick was used to transfer a portion of a bacterial colony to a sterilized  
340 microcentrifuge tube containing 5  $\mu$ L of HPLC grade TFA. Samples remained in TFA for 30  
341 minutes to facilitate cell lysis and protein extraction. Following this incubation time, DI water (20  
342  $\mu$ L) and acetonitrile (30  $\mu$ L) were added to each sample, briefly vortexed, and centrifuged at  
343 10,000 rpm for two minutes. The supernatant (1.5  $\mu$ L) was mixed with 1.5  $\mu$ L of  $\alpha$ -cyano-4-  
344 hydroxycinnamic acid (CHCA) matrix for a 1:1 ratio of sample to matrix. The 1:1 sample:matrix  
345 mixture was then plated on a MALDI target plate in technical triplicate for IDBac analysis (1  $\mu$ L).  
346 Measurements were performed in positive linear and reflection modes on an Autoflex Speed  
347 LRF mass spectrometer (Bruker Daltonics) equipped with a smartbeam-II laser (355 nm).

348 *16S sequencing molecular analysis.* Total genomic DNA was extracted using a commercially  
349 available DNeasy Ultraclean Microbial Kit (Qiagen) following the manufacturer's  
350 recommendations. Primer pair 27F (5'-CAGAGTTTGATCCTGGCT-3') and 1492R (5'-  
351 AGGAGGTGATCCAGCCGCA-3') were used to amplify the partial 16S ribosomal RNA (rRNA)  
352 gene sequence.<sup>43</sup> PCR conditions in a BioRad thermocycler were as follows: initial denaturation  
353 at  $95^{\circ}\text{C}$  for 5 minutes, followed by 35 cycles of denaturation at  $95^{\circ}\text{C}$  for 15 seconds, annealing

354 at 60°C for 15 seconds, and extension at 72 °C for 30 seconds, and a final extension step at 72  
355 °C for 2 minutes. Each amplified product was purified using QIAquick PCR Purification kit from  
356 Qiagen, followed by Sanger sequencing. Data analyzed by Geneious V11.1.4 software.

357 *IDBac protein analysis.* To generate dendrograms, MALDI-TOF MS protein data was uploaded  
358 to IDBac. The following settings were used to generate reported dendrogram: percent presence:  
359 70, signal to noise ratio: 4, lower mass cutoff: 3,000, upper mass cutoff: 15,000, ppm tolerance:  
360 1000, distance algorithm: euclidean, clustering algorithm: ward.D2, used peak  
361 presence/absence as grouping criteria.

362 *IDBac Metabolite association networks.* A new dendrogram was constructed in IDBac using  
363 MALDI-TOF MS data collected on the 16 isolates that were grown on both fiber and ISP2  
364 medium using the same settings as previously. For MANs, isolates SF2016, N2015 and S2008  
365 were selected and the following settings were applied; percent presence: 70, signal to noise  
366 ratio: 4, lower mass cutoff: 200, upper mass cutoff: 2,000, ppm tolerance: 1,000, sample  
367 subtraction: Matrix. The network data was downloaded as a .csv file from IDBac and  
368 imported into Gephi version 0.9.2. This was repeated with sample subtraction being changed  
369 to fiber and ISP2 agar controls. In Gephi, MANs for the same isolate were compared and nodes  
370 corresponding to matrix or agar controls were manually removed to generate reported figures.

371 *Metabolite extraction from bacterial isolates.* Isolates SF2016, N2105, and S2008 were plated  
372 on thin (3 mL of agar in 60 mm petri dish) SNF + Fiber or ISP2 media in duplicate. Samples and  
373 control plates were grown for three days at 25 °C. Entire contents of petri dish extracted with 3  
374 mL of MeOH and sonicated for 30 minutes. Crude extract were used for HR-LC-MS analysis  
375 and stored at -20 °C. All extractions were performed in biological replicates (N =3).

376 *HR-LC-MS data collection and XCMS analysis.* Biological extracts were pooled (1mg/mL) and  
377 run on a Bruker Impact II qTOF with a C18 UPLC (Phenomenex) in two technical replicates.  
378 The method for MS<sup>1</sup> data collection was as follows: solvent A (H<sub>2</sub>O with 0.1% formic acid) and  
379 solvent B (ACN with 0.1% formic acid). 10% isocratic solvent B for 2 minutes, 10%-100%

380 gradient of solvent B for 8 minutes, 2 minute wash of 100% solvent B and 2 minute equilibration.  
381 Data was converted to .mzXML from Bruker software Data Analysis and uploaded to the online  
382 metabolomics platform XCMS. Pairwise comparisons of SF2016F vs Fiber agar, SF2016I vs  
383 ISP2 agar, and SF2016F vs SF2016I were run using Parameter ID: UPLC/Bruker Q-TOF pos.  
384 The same analysis was run for isolates N2015 and S2008. Cloud plots were generated with the  
385 following settings; p-value: 0-0.001, fold change:  $\geq 1.5$ , retention time: 1-12, intensity:  $\geq 5,000$ .  
386 For XCMS meta analysis, pairwise jobs of each of the three isolates versus the fiber control  
387 were selected and run with the following settings; fold change  $\geq 1.5$ , max p-value  $\leq 0.001$ , max  
388 intensity  $\geq 5,000$ , *m/z* tolerance 0.01, RT tolerance 60 secs. The same workflow was repeated  
389 for meta analysis of each isolate with ISP2 control.

390

### 391 **Acknowledgements**

392 This publication was supported by the National Institute of General Medical Sciences of the  
393 National Institutes of Health under Award Number R01GM125943 (LMS and BTM); University of  
394 Illinois at Chicago Startup Funds (LMS); Icelandic Research Fund Grant 152336-051 (B.T.M.  
395 and Dr. Sesselja Omarsdottir); American Society for Pharmacognosy research startup grant  
396 (LMS). ARC was supported in part by the National Science Foundation Illinois Louis Stokes  
397 Alliance for Minority Participation Bridge to the Doctorate Fellowship (grant number 1500368)  
398 and a UIC Abraham Lincoln retention fellowship.

### 399 **References: No more than 85**

400 1. Staley JT, Konopka A. Measurement of in situ activities of nonphotosynthetic



- 401 microorganisms in aquatic and terrestrial habitats. *Annu Rev Microbiol* 1985; 39:321–46.
- 402 2. Lagier J-C, Edouard S, Pagnier I, Mediannikov O, Drancourt M, Raoult D. Current and past  
403 strategies for bacterial culture in clinical microbiology. *Clin Microbiol Rev* 2015; 28:208–36.
- 404 3. Chung KT, Hungate RE. Effect of alfalfa fiber substrate on culture counts of rumen bacteria.  
405 *Appl Environ Microbiol* 1976; 32:649–52.
- 406 4. Moraes-Cerdeira RM, Krans JV, McChesney JD, Pereira AMS, Franca SC. Cotton Fiber as  
407 a Substitute for Agar Support in Tissue Culture. *HortScience* 1995; 30:1082–3.
- 408 5. Ferris MJ, Hirsch CF. Method for isolation and purification of cyanobacteria. *Appl Environ*  
409 *Microbiol* 1991; 57:1448–52.
- 410 6. Zhao S, Shamoun SF. The effects of culture media, solid substrates, and relative humidity  
411 on growth, sporulation and conidial discharge of *Valdensinia heterodoxa*. *Mycol Res* 2006;  
412 110:1340–6.
- 413 7. Jensen PR, Gontang E, Mafnas C, Mincer TJ, Fenical W. Culturable marine actinomycete  
414 diversity from tropical Pacific Ocean sediments. *Environ Microbiol* 2005; 7:1039–48.
- 415 8. Tran H, Stephenson S, Pollock E. Evaluation of *Physarum polycephalum* plasmodial growth  
416 and lipid production using rice bran as a carbon source. *BMC Biotechnol* 2015; 15:67.
- 417 9. Varghese LM, Agrawal S, Sharma D, Mandhan RP, Mahajan R. Cost-effective screening  
418 and isolation of xylano-cellulolytic positive microbes from termite gut and termitarium. *3*  
419 *Biotech* 2017; 7:108.
- 420 10. Bisht D, Yadav SK, Gautam P, Darmwal NS. Simultaneous production of alkaline lipase  
421 and protease by antibiotic and heavy metal tolerant *Pseudomonas aeruginosa*. *J Basic*  
422 *Microbiol* 2013; 53:715–22.
- 423 11. Wang B, You J, King JB, Cai S, Park E, Powell DR, Cichewicz RH. Polyketide glycosides  
424 from *Bionectria ochroleuca* inhibit *Candida albicans* biofilm formation. *J Nat Prod* 2014;  
425 77:2273–9.
- 426 12. Timmermans ML, Picott KJ, Ucciferri L, Ross AC. Culturing marine bacteria from the genus  
427 *Pseudoalteromonas* on a cotton scaffold alters secondary metabolite production.  
428 *Microbiologyopen* 2018; :e00724.
- 429 13. Peach KC, Bray WM, Shikuma NJ, Gassner NC, Lokey RS, Yildiz FH, Linington RG. An  
430 image-based 384-well high-throughput screening method for the discovery of biofilm  
431 inhibitors in *Vibrio cholerae*. *Mol Biosyst* 2011; 7:1176–84.
- 432 14. Wong WR, Oliver AG, Linington RG. Development of antibiotic activity profile screening for  
433 the classification and discovery of natural product antibiotics. *Chem Biol* 2012; 19:1483–95.
- 434 15. Stephens WZ, Burns AR, Stagaman K, Wong S, Rawls JF, Guillemin K, Bohannan BJM.  
435 The composition of the zebrafish intestinal microbial community varies across development.  
436 *ISME J* 2016; 10:644–54.
- 437 16. Roeselers G, Mittge EK, Stephens WZ, Parichy DM, Cavanaugh CM, Guillemin K, Rawls  
438 JF. Evidence for a core gut microbiota in the zebrafish. *ISME J* 2011; 5:1595–608.

- 439 17. Clark CM, Costa MS, Sanchez LM, Murphy BT. Coupling MALDI-TOF mass spectrometry  
440 protein and specialized metabolite analyses to rapidly discriminate bacterial function. *Proc*  
441 *Natl Acad Sci U S A* 2018; 115:4981–6.
- 442 18. Davies J. Specialized microbial metabolites: functions and origins. *J Antibiot* 2013; 66:361–  
443 4.
- 444 19. Hong K, Gao A-H, Xie Q-Y, Gao H, Zhuang L, Lin H-P, Yu H-P, Li J, Yao X-S, Goodfellow  
445 M, et al. Actinomycetes for marine drug discovery isolated from mangrove soils and plants  
446 in China. *Mar Drugs* 2009; 7:24–44.
- 447 20. Clark CM, Costa MS, Conley E, Li E, Sanchez LM, Murphy BT. Using the Open-Source  
448 MALDI TOF-MS IDBac Pipeline for Analysis of Microbial Protein and Specialized Metabolite  
449 Data. *J Vis Exp [Internet]* 2019; Available from: <http://dx.doi.org/10.3791/59219>
- 450 21. Freiwald A, Sauer S. Phylogenetic classification and identification of bacteria by mass  
451 spectrometry. *Nat Protoc* 2009; 4:732–42.
- 452 22. Mohseni M, Norouzi H, Hamed J, Roohi A. Screening of antibacterial producing  
453 actinomycetes from sediments of the caspian sea. *Int J Mol Cell Med* 2013; 2:64–71.
- 454 23. Ochoa JL, Sanchez LM, Koo B-M, Doherty JS, Rajendram M, Huang KC, Gross CA,  
455 Linington RG. Marine Mammal Microbiota Yields Novel Antibiotic with Potent Activity  
456 Against *Clostridium difficile*. *ACS Infect Dis* 2018; 4:59–67.
- 457 24. Sanchez LM, Wong WR, Riener RM, Schulze CJ, Linington RG. Examining the fish  
458 microbiome: vertebrate-derived bacteria as an environmental niche for the discovery of  
459 unique marine natural products. *PLoS One* 2012; 7:e35398.
- 460 25. Mincer TJ, Jensen PR, Kauffman CA, Fenical W. Widespread and persistent populations of  
461 a major new marine actinomycete taxon in ocean sediments. *Appl Environ Microbiol* 2002;  
462 68:5005–11.
- 463 26. Elfeki M, Alanjary M, Green SJ, Ziemert N, Murphy BT. Assessing the Efficiency of  
464 Cultivation Techniques To Recover Natural Product Biosynthetic Gene Populations from  
465 Sediment. *ACS Chem Biol* 2018; 13:2074–81.
- 466 27. Wolfe BE, Button JE, Santarelli M, Dutton RJ. Cheese rind communities provide tractable  
467 systems for in situ and in vitro studies of microbial diversity. *Cell* 2014; 158:422–33.
- 468 28. Jandhyala SM, Talukdar R, Subramanyam C, Vuyyuru H, Sasikala M, Nageshwar Reddy  
469 D. Role of the normal gut microbiota. *World J Gastroenterol* 2015; 21:8787–803.
- 470 29. Huang Y, Shi X, Li Z, Shen Y, Shi X, Wang L, Li G, Yuan Y, Wang J, Zhang Y, et al.  
471 Possible association of Firmicutes in the gut microbiota of patients with major depressive  
472 disorder. *Neuropsychiatr Dis Treat* 2018; 14:3329–37.
- 473 30. Duncan SH, Louis P, Flint HJ. Cultivable bacterial diversity from the human colon. *Lett Appl*  
474 *Microbiol* 2007; 44:343–50.
- 475 31. Tam NKM, Uyen NQ, Hong HA, Duc LH, Hoa TT, Serra CR, Henriques AO, Cutting SM.  
476 The intestinal life cycle of *Bacillus subtilis* and close relatives. *J Bacteriol* 2006; 188:2692–  
477 700.

- 478 32. Kong W, Huang C, Tang Y, Zhang D, Wu Z, Chen X. Effect of *Bacillus subtilis* on  
479 *Aeromonas hydrophila*-induced intestinal mucosal barrier function damage and  
480 inflammation in grass carp (*Ctenopharyngodon idella*). *Sci Rep* 2017; 7:1588.
- 481 33. Mocho J-P, Martin DJ, Millington ME, Saavedra Torres Y. Environmental Screening of  
482 *Aeromonas hydrophila*, *Mycobacterium* spp., and *Pseudocapillaria tomentosa* in Zebrafish  
483 Systems. *J Vis Exp [Internet]* 2017; Available from: <http://dx.doi.org/10.3791/55306>
- 484 34. Binda C, Lopetuso LR, Rizzatti G, Gibiino G, Cennamo V, Gasbarrini A. Actinobacteria: A  
485 relevant minority for the maintenance of gut homeostasis. *Dig Liver Dis* 2018; 50:421–8.
- 486 35. Sharma KK, Kalawat U. Emerging infections: shewanella - a series of five cases. *J Lab*  
487 *Physicians* 2010; 2:61–5.
- 488 36. de Abreu PM, Farias PG, Paiva GS, Almeida AM, Morais PV. Persistence of microbial  
489 communities including *Pseudomonas aeruginosa* in a hospital environment: a potential  
490 health hazard. *BMC Microbiol* 2014; 14:118.
- 491 37. Dailey FE, McGraw JE, Jensen BJ, Bishop SS, Lokken JP, Dorff KJ, Ripley MP, Munro JB.  
492 The Microbiota of Freshwater Fish and Freshwater Niches Contain Omega-3 Fatty Acid-  
493 Producing *Shewanella* Species. *Appl Environ Microbiol* 2016; 82:218–31.
- 494 38. Tautenhahn R, Patti GJ, Rinehart D, Siuzdak G. XCMS Online: a web-based platform to  
495 process untargeted metabolomic data. *Anal Chem* 2012; 84:5035–9.
- 496 39. Patti GJ, Tautenhahn R, Siuzdak G. Meta-analysis of untargeted metabolomic data from  
497 multiple profiling experiments. *Nat Protoc* 2012; 7:508–16.
- 498 40. Pye CR, Bertin MJ, Lokey RS, Gerwick WH, Linington RG. Retrospective analysis of  
499 natural products provides insights for future discovery trends. *Proc Natl Acad Sci U S A*  
500 2017; 114:5601–6.
- 501 41. Katz L, Baltz RH. Natural product discovery: past, present, and future. *J Ind Microbiol*  
502 *Biotechnol* 2016; 43:155–76.
- 503 42. White RM, Sessa A, Burke C, Bowman T, LeBlanc J, Ceol C, Bourque C, Dovey M,  
504 Goessling W, Burns CE, et al. Transparent adult zebrafish as a tool for in vivo  
505 transplantation analysis. *Cell Stem Cell* 2008; 2:183–9.
- 506 43. Lane DJ. 16S/23S rRNA sequencing.(eds. Stackebrandt E. Goodfellow M) *Nucleic Acid*  
507 *Tech. Bact. Syst.* 115--175. 1991;
- 508 44. Hu Y. Efficient, high-quality force-directed graph drawing. *Mathematica Journal* 2005;  
509 10:37–71.

510

511 Figure Legends

512 **Figure 1: Diversity plates of isolated gut microbes.** Using four types of agar, we observed a  
513 significant increase of bacterial growth in plates supplemented with insoluble fiber. The amount  
514 of growth observed in fiber supplemented plates (SNF + Fiber) was equivalent to that  
515 documented in high vitamin plates (HVF).

516 **Figure 2: IDBac constructed dendrogram of cultivated bacterial isolates from the**  
517 **zebrafish gut.** Our library is composed of over 80 isolates covering three phyla. To generate  
518 the IDBac dendrogram the following analysis settings were used: percent presence: 70, Signal  
519 to noise ratio: 4, Lower mass cutoff: 3,000, Upper mass cutoff: 15,0000, ppm tolerance: 1000.  
520 Distance algorithm: euclidean, Clustering algorithm: ward.D2, used presence/absence setting  
521 for dendrogram cladding.

522 **Figure 3: Comparison of metabolite production with and without fiber.** (A) IDBac  
523 dendrogram of 16 isolates grown with or without fiber. (B) Metabolite association network (MAN)  
524 of isolates S2008 and N2015 grown with and without fiber. (C) MAN of isolate SF2016  
525 comparing the metabolites produced when grown with or without fiber. Any *m/z* nodes  
526 corresponding to matrix or agar controls were subtracted prior to analysis. To generate the  
527 MANs the analysis settings used were as follows: percent presence: 70, Signal to noise:4,  
528 Lower mass cutoff: 200, Upper mass cutoff: 20000, ppm tolerance: 1000. Rather than displaying  
529 the MAN for the entire dendrogram, specific samples were highlighted and the corresponding  
530 MAN was downloaded to visualize in open graph platform Gephi (version 0.9.2) using the Yifan  
531 Hu layout.<sup>44</sup>

532  
533 **Figure 4: Gut microbe growth on fiber agar increases specialized metabolite production.**  
534 HR-LC-MS data collected from metabolite extracts of library isolates SF2016, N2015, and  
535 S2008 were analyzed using XCMS pairwise and meta analysis. (A) Cloud plot comparison of  
536 SF2016 grown on fiber agar (top) and fiber agar control (bottom) highlighting significant  
537 metabolites (dots) produced by SF2016 when grown on fiber agar. The intensity of color of a  
538 circle correlates to the increased significance of the upregulated signal. (B) Cloud plot  
539 comparison of SF2016 grown on ISP2 agar (top) and ISP2 agar control (bottom). The Venn  
540 diagrams on the right represents the number of signals that are unique to each library isolate  
541 when grown on (C) fiber agar or (D) ISP2 medium.

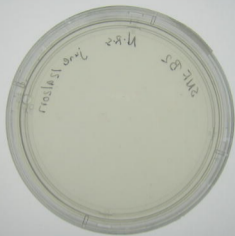

SNF

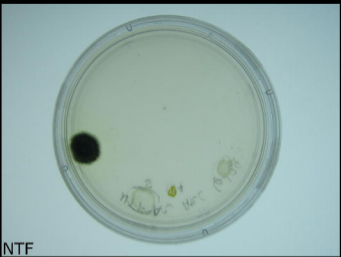

NTF

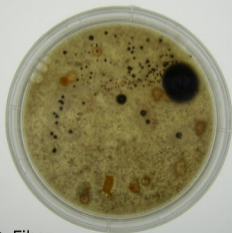

SNF + Fiber

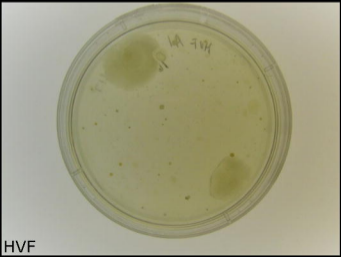

HVF



**A**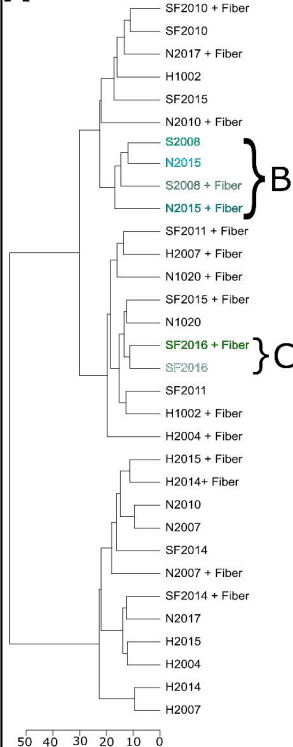**B**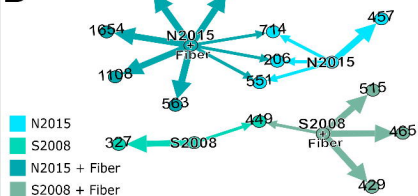**C**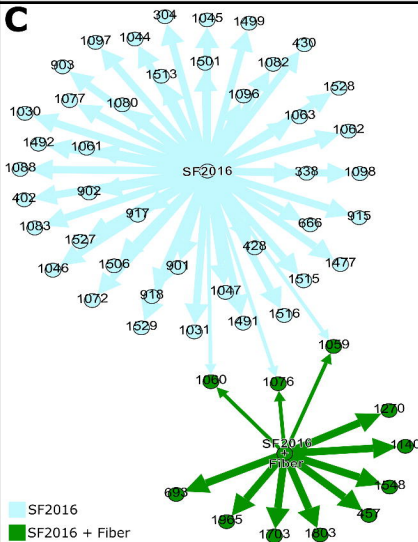

**A**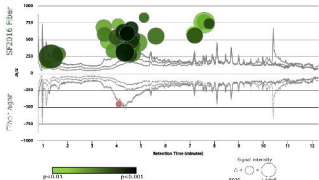**C**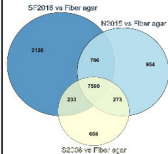**B**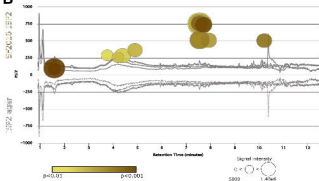**D**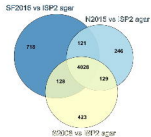

Source: https://www.biorxiv.org/content/10.1101/854109v1.full.pdf
